1     **An Innovative Setup for High-Throughput Respirometry of**  
2                                    **Small Aquatic Animals**

3  
4

5     M.K. Drown, A.N. DeLiberto, D.L. Crawford and M.F. Oleksiak  
6     University of Miami Rosenstiel School of Marine and Atmospheric Science, Miami, FL, USA

7  
8

Keywords: *Fundulus heteroclitus*, evolutionary analysis, standard metabolic rate

9 ***ABSTRACT***

10 Metabolic rate is often measured as a phenotype in evolutionary genetics studies because it  
11 impacts organismal fitness, is repeatable and heritable, and is responsive to numerous  
12 environmental variables. Despite a wide body of literature about metabolic rates, key questions  
13 remain unanswered: 1) why do individuals from the same population exhibit up to three fold  
14 differences in metabolic rate, 2) how does metabolic rate change during an individual's lifetime,  
15 and 3) what metabolic rate is advantageous in a specific environment? Current low throughput  
16 approaches to measure metabolic rate make it difficult to answer these and other relevant  
17 ecological and evolutionary questions that require a much larger sample size. Here we describe a  
18 scalable high-throughput intermittent flow respirometer (HIFR) design and use it to measure the  
19 metabolic rates of 20 aquatic animals simultaneously while reducing equipment costs and time  
20 by more than 50%.

21 ***INTRODUCTION***

22 Metabolic rate is often measured as a phenotype in evolutionary genetics studies because it is  
23 known to impact organismal fitness, is repeatable and heritable, and is affected by a variety of  
24 environmental variables (1-5). The relationship between metabolic rate and a variable of interest,  
25 such as temperature, oxygen availability, or toxicant exposure, has been investigated frequently,  
26 which has led to a rich literature on metabolic rates in many species (7-11). Despite this wide  
27 body of literature, key questions about metabolic rates remain unanswered including 1) why do  
28 individuals from the same population exhibit up to three fold differences in metabolic rate under  
29 similar acclimation conditions and activity levels, 2) how does metabolic rate change during an  
30 individual's lifetime, and 3) what metabolic rate is advantageous in a specific environment (7)?  
31

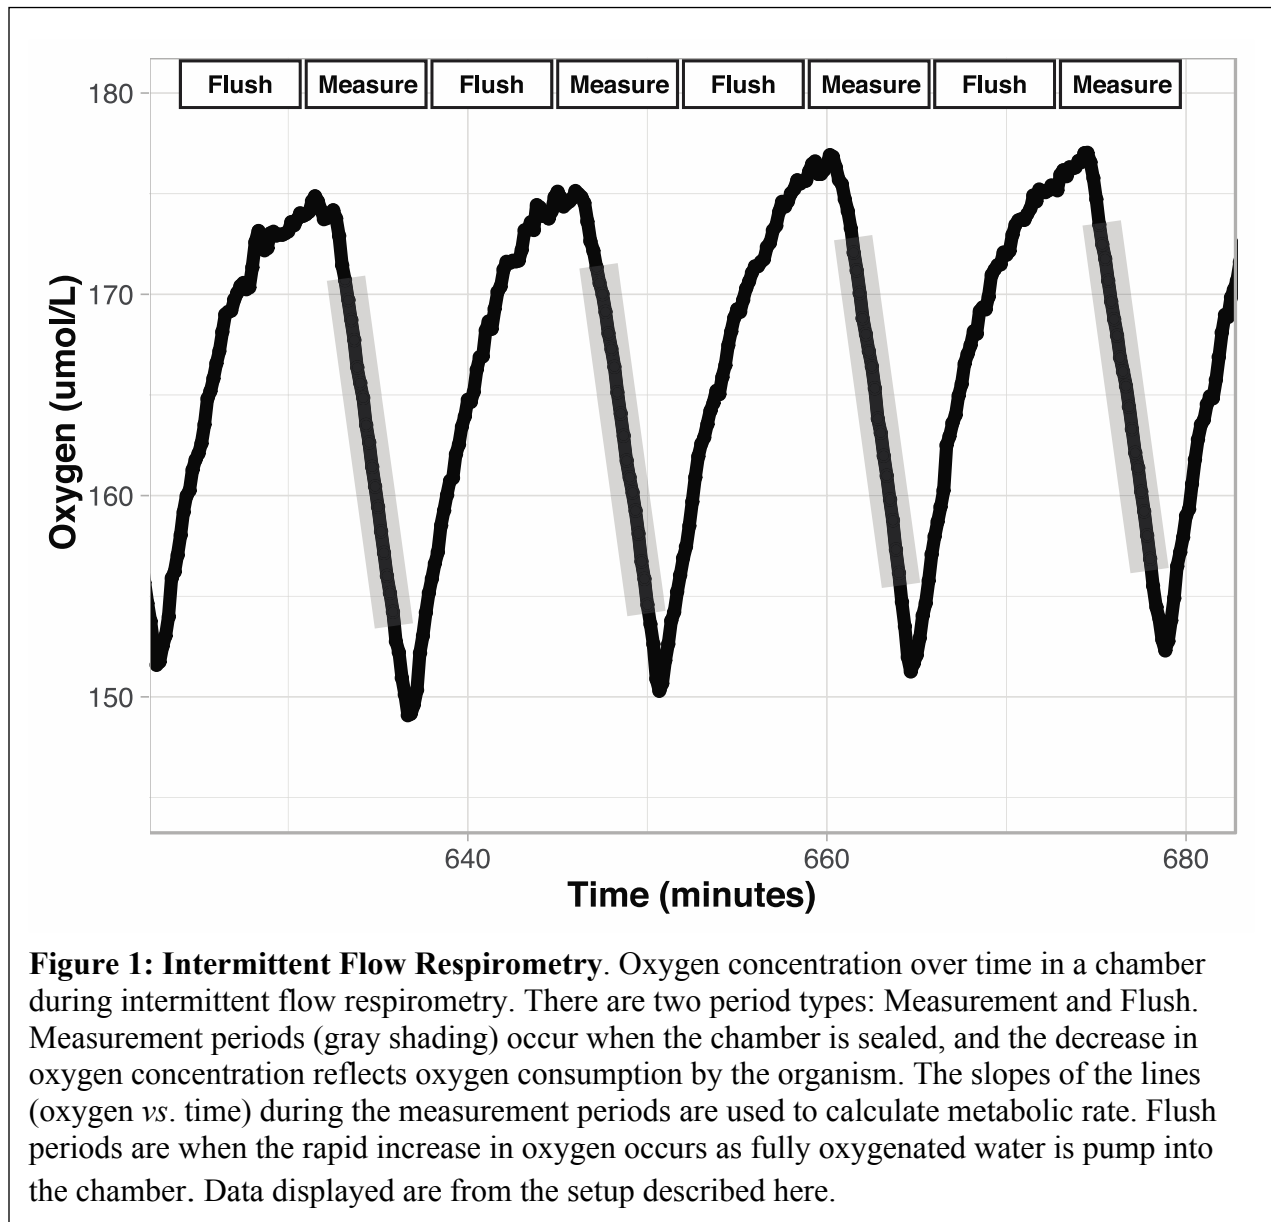

32

33 Flow through respirometry, intermittent-flow respirometry (IFR), and closed respirometry are  
34 techniques used to measure metabolic rates in terrestrial and aquatic organisms. Flow through  
35 respirometry is achieved by measuring the amount of oxygen entering and leaving a chamber  
36 relative to the flow rate of air or water through the chamber (12). In IFR the respirometer cycles  
37 between open and closed periods. During open periods the chamber is flushed to remove waste  
38 and oxygen is replenished and during closed periods the animal is using oxygen sealed in the  
39 chamber (Fig. 1) (12, 13). Closed respirometry places an organism in a sealed chamber of known  
40 volume and measures oxygen or carbon dioxide partial pressures at multiple time points  
41 throughout the trial. The sealed chamber during closed respirometry may result in the  
42 accumulation of nitrogenous waste and carbon dioxide, which can increase stress, and may cause  
43 loss of equilibrium (LOE) in aquatic organisms (14).

44 Flow-through respirometry and IFR methods may be applied to measure standard, resting, or  
45 maximum metabolic rate. In contrast, closed respirometry uses a single closed period and yields  
46 an average metabolic rate based on oxygen consumption at multiple time points as oxygen  
47 declines in the chamber (15). Standard metabolic rate (SMR) is measured when an animal is at  
48 rest and in a post-absorptive state (i.e., fasting). Routine metabolic rate (RMR) is similar to SMR  
49 but includes spontaneous activity in animals that do not have a motionless rest cycle (16).  
50 Maximum metabolic rate (MMR) is the highest maintainable metabolic rate an individual can  
51 achieve (13).

52 To measure metabolic rate, swim tunnels or respirometers can be purchased. Both are widely  
53 available with a variety of oxygen sensing technologies and software packages. Typically, these  
54 swim tunnels or respirometers are designed to house one organism at a time for several hours or  
55 days in order to achieve a precise measure of metabolic rate, and they are often expensive to  
56 purchase as a complete measurement system (~\$20,000). Some companies additionally offer  
57 high-throughput versions (up to 8 chambers) for small animals; however, the cost remains high  
58 (>\$2000 per chamber when including software and oxygen sensing technology, ex: Loligo  
59 complete mini chamber system) with variable cost depending on the size of the chambers  
60 desired. While some authors have indicated that they have the capacity to measure 8 or more  
61 individuals simultaneously and report measuring dozens of individuals (17, 18), details of  
62 procedures and methods used as well as cost effectiveness are not publicly available. These  
63 restrictions make it challenging to measure metabolic rate rapidly for a large number of  
64 individuals without introducing time bias as the first and last individual may be measured weeks  
65 or months apart depending on sample size. With little known about the way metabolic rate  
66 changes within an individual's lifetime, it is difficult to know how much variation among  
67 individuals is due to time *versus* physiological differences in experiments entailing weeks to  
68 months between the first and last individual measurements (7). The limitation on throughput  
69 additionally prevents questions relevant to ecology and evolution from being answered as these  
70 questions often require a much larger sample size than can feasibly be measured with current  
71 available methodologies. Given the high interindividual variation in metabolic rate,  
72 characterizing ten or twenty individuals at a given life stage or under specific treatment  
73 conditions may not capture the scope and shape of the physiological response to various stressors  
74 within a population or species and would inhibit the discovery of broad patterns across taxa (2,  
75 7). Additionally, due to the plasticity of metabolic rates in some species, measuring metabolic  
76 rate at one time point in one environment may not reflect an ecologically relevant trait. Thus, our  
77 ability to understand variation in metabolic rate will be limited until we are able to reasonably  
78 measure larger sample sizes for species or populations of interest or to obtain repeated measures  
79 of the same individuals across various timepoints and in various environments. Here we describe  
80 a scalable high-throughput intermittent flow respirometer (HIFR) design and use it to measure  
81 the metabolic rate of 20 aquatic animals simultaneously, which may allow us to achieve the large  
82 sample sizes needed to answer these complex questions.

83 **MATERIALS AND METHODS**

84 The custom HIFR system is a large water bath with a PVC rack that holds 20 glass chambers.  
85 Each chamber has tubing and pumps to flush the chamber and re-circulate water that passes by  
86 an oxygen sensor (Fig. 2).

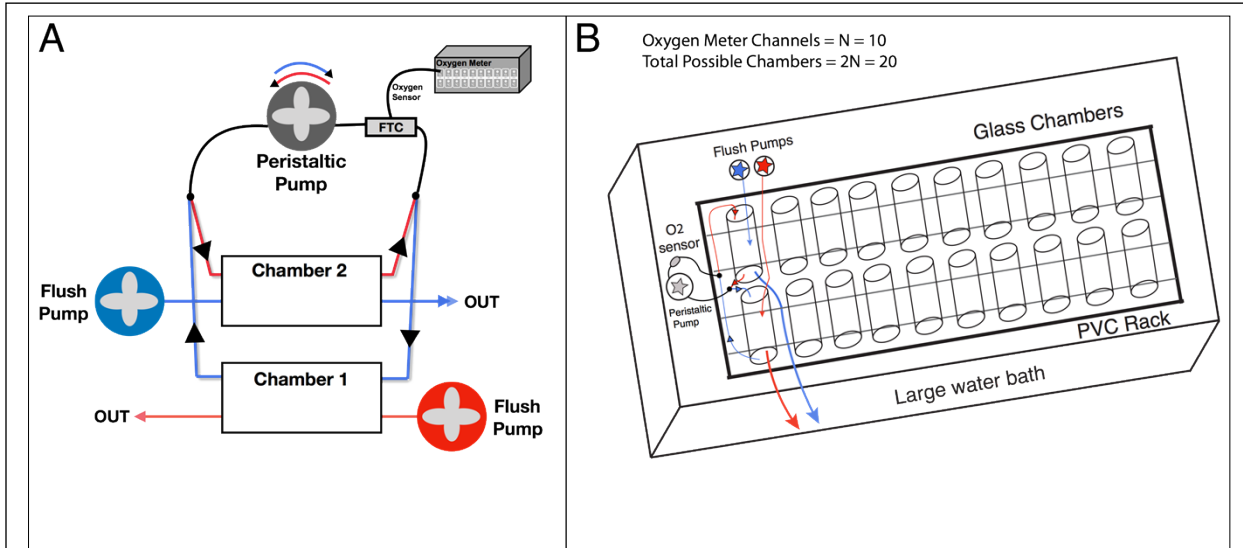

**Figure 2: Pumping Circuits.** **A)** Pairs of chambers in the high-throughput intermittent flow respirometer. Circuit 1 (red), circuit 2 (blue). One-way valves (black arrows) control flow direction. By changing the polarity of the peristaltic pump motor, the peristaltic pump direction changes. **B)** Overall schematic of HIFR. The basic design is a PVC rack that holds and secures glass chambers with their rubber stoppers, which is placed in a large water bath. Each chamber is connected to flush pumps and re-circulating pumps with oxygen sensors. Throughput is limited by the number of channels on the oxygen meter (N) with this design able to measure 2N individuals simultaneously.

87  
88 The large water bath (1.2 m long, 1.1 m wide, 0.3 m deep) was constructed out of 0.635  
89 cm thick plexiglass and sealed with plastic weld and silicone glue to prevent leaking. A PVC  
90 rack with twenty slots separated by small PVC pieces was placed in the water bath, and a 0.300  
91 L glass chamber was placed in each slot and sealed with two rubber stoppers. Each rubber  
92 stopper had two 0.635 cm stainless steel tubes to attach flexible tubing connected to pumps.  
93 Glass chambers were then paired and attached to one peristaltic pump (60 mL/minute) and two  
94 separate flush pumps with flow directed to 10 chambers each (300 mL/minute per chamber). A  
95 flow-through-cell with an oxygen sensor with a fiber optic cable (FTC) was placed in line with  
96 the peristaltic pump. The fiber optic oxygen sensor was attached to a 10-channel oxygen meter  
97 (PreSens Precision Sensing, Regensburg Germany). A separate PT-100 temperature probe was  
98 placed in the large water bath (PreSens Precision Sensing, Regensburg Germany). PreSens  
99 Measurement Studio 2.0 software was used to record oxygen over time as the peristaltic pump  
100 recirculated water through the FTC and past the oxygen sensor then back to the chamber.

101 An Arduino Uno with a 5V relay and a set of double pole double throw relays was used to  
102 control the direction the peristaltic pump turned and the power to the flush pumps. One-way  
103 valves were used to control the flow path to and from the peristaltic pump such that when the

104 pump rotated clockwise, it would draw water from one chamber past the FTC, and when the  
105 pump rotated counter-clockwise, it would draw water from a second chamber (Fig. 2). Thus, all  
106 the odd numbered chambers be measured while the even numbered chambers were being flushed  
107 and *vice versa*. The one-way valves also prevented the back-flux of water so that water was not  
108 mixed between sets of chambers. In this way the ten peristaltic pumps with FTCs were used to  
109 measure oxygen levels in 10 of the 20 chambers at one time and would oscillate between sets of  
110 10 by changing the polarity of the peristaltic pump motor. Altering flow between the ten FTC  
111 and the flush circuit allowed the 10-channel oxygen meter to measure the twenty respirometers  
112 housed in the temperature-controlled water bath. A detailed list of materials and costs for  
113 building a HIFR can be found in Table S1, and a schematic of the electric circuit used to control  
114 and power pumps is depicted in Figure S1.

### 115 **Animal care and use:**

116 *Fundulus heteroclitus* are a small estuarine fish often used to address questions in physiology  
117 and genetics because they are known to be highly plastic and adaptable to changing  
118 environments. Found from New Brunswick, Canada to northern Florida along the East Coast of  
119 the United States, *F. heteroclitus* live along a thermal cline of at least 14°C and additionally  
120 experience variation in temperature, salinity, water depth, and dissolved oxygen with daily tidal  
121 cycles and seasonal weather changes (19, 20).

122 *F. heteroclitus* were caught in live traps along the east coast of the United States in New Jersey  
123 and transported live to the University of Miami where they were housed according to the  
124 institutional animal care and use committee guidelines (Animal Use Protocol No: 16-127-  
125 adm04). *F. heteroclitus* were collected on public lands and do not require a permit for non-profit  
126 use. Fish were common gardened at 20°C 15ppt for greater than 6 weeks on a summer light cycle  
127 (14 hours daylight, 10 hours dark), overwintered at 10°C and 15ppt (5 hours daylight 19 hours  
128 dark) for 4 weeks, and then acclimated to 28°C and 15ppt for at least four weeks on a summer  
129 light cycle (14 hours daylight, 10 hours dark). Fish were fed pelleted food to saturation once  
130 daily and fasted for 24 hours prior to metabolic rate determination.

131 To identify individuals, all fish had unique visual implant elastomer (VIE) tags. Metabolic rates  
132 were measured after at least four weeks of acclimation to 28°C.

### 133 **Metabolic rate calculation:**

134 Individuals were measured overnight where they were left undisturbed for at least 14 hours. Fish  
135 were identified then immediately placed in a chamber between 16:30h and 17:30h and the first  
136 replicate measurement period began after midnight, allowing a minimum of 6.5 hours of  
137 acclimation to the chamber. Each measurement period lasted 6 minutes followed by a 6-minute  
138 flush period to prevent oxygen levels from dropping below 80% in any given chamber and to  
139 fully replenish oxygen levels in the chamber between replicate measurements. The water bath  
140 housing the twenty chambers was continuously recirculating with an aquarium system containing  
141 a biofilter of nitrogen fixing bacteria to reduce ammonium load and a heating unit that kept the  
142 water bath at the desired temperature ( $\pm 1^\circ\text{C}$ ).

143 After each night, data files were exported from PreSens measurement studio and analysis was  
144 done using R (version 1.1.383). From each 6-minute measurement, the first and last 1 minutes  
145 were excluded as a buffer between the flush pump turning off and the measurement period

146 starting. An R-Markdown script detailing the processing of raw data files is available on github  
147 ([https://github.com/mxd1288/FunHe\\_Genomics/blob/master/Raw\\_Metabolic\\_Rate\\_Pipeline.R](https://github.com/mxd1288/FunHe_Genomics/blob/master/Raw_Metabolic_Rate_Pipeline.R)  
148 [d](#)).  
149 The slope of oxygen levels over time was extracted using a linear model for each replicate  
150 measurement period, and  $MO_2$  in  $\mu\text{mol O}_2\text{l}^{-1}$  was calculated using the equation  $y=KV$  then  
151 converted to  $\text{mg O}_2\text{l}^{-1}$  for comparability, where  $y=MO_2$  ( $\mu\text{mol O}_2\text{min}^{-1}$ ),  $K=\text{slope}$  ( $\mu\text{mol min}^{-1}$ ),  
152  $V=$  volume of the respirometer (including tubing) minus volume of the organism (liters) (13).  
153 Any data collected while the lights were on in the room (before 23:00h or after 06:30h) or a  
154 slope with an  $R^2$  value less than 0.9 were excluded from the analysis. Between midnight and  
155 06:30h at least 25 measurement periods were completed for each individual, of those at least 20  
156 were used for analysis after exclusion based on  $R^2$  value. The lower 10<sup>th</sup> percentile values from  
157 the cumulative frequency distribution of all replicates from that individual were used to estimate  
158 standard metabolic rate (SMR). Using the lower 10<sup>th</sup> percentile value from the cumulative  
159 frequency distribution did not average the lowest two metabolic rate measures. One value for  
160 each individual that lay on the continuous cumulative frequency distribution at the 10<sup>th</sup> percentile  
161 was selected to represent each individual. This lower 10<sup>th</sup> percentile value captures the time  
162 period when the fish were most at rest during measurement and excludes the lowest tail of the  
163 data distribution, which may be sensitive to outliers (16, 21, 22). (Fig. 3).

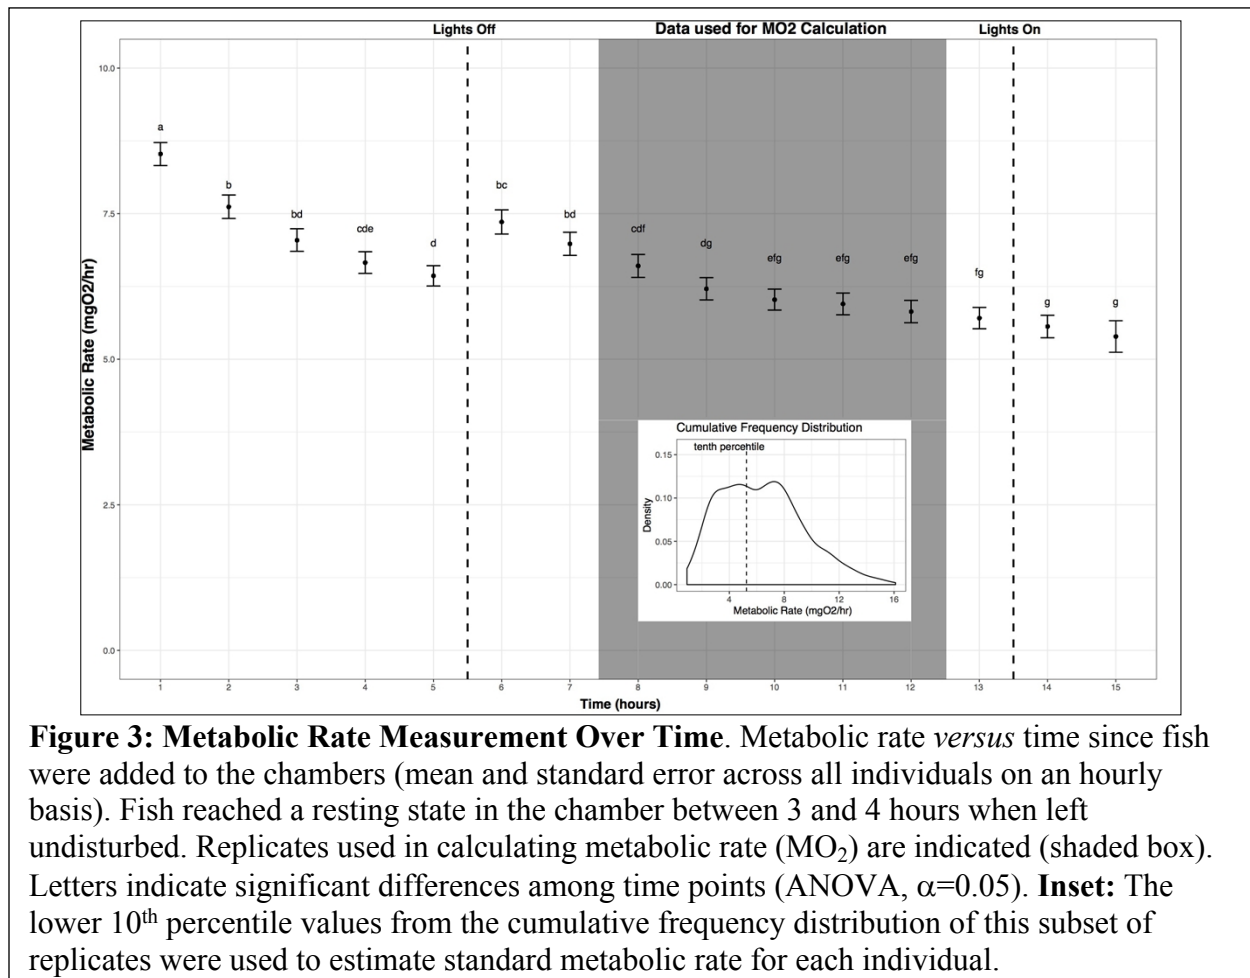



164 **Body mass correction:**

165 To compare metabolic rates among individuals that vary in size, metabolic rate must be corrected  
166 for body mass. Fish were weighed to the nearest 0.1g the day of metabolic rate measurement.  
167 After calculating SMR the residuals of the model metabolic rate (log transformed) vs. body mass  
168 (log transformed) were used as the body mass corrected SMR (23).

169 **Background respiration:**

170 In order to correct for oxygen used by bacteria and other microorganisms in the HIFR, blank  
171 runs were completed in between each use of the HIFR and average background respiration  
172 subtracted from the  $MO_2$  of each fish (Eq. 2).

173 **Eq 2:**  $MO_2\_corrected = MO_2 - \text{background respiration}$

174 Where  $MO_2$  is the minimum metabolic rate of each fish as previously described and background  
175 respiration was a chamber specific value calculated by averaging the oxygen consumption over  
176 time in each empty chamber across three replicate blank runs. An empty chamber was  
177 additionally run in parallel each night and the background respiration did not change over the  
178 course of the night validating the decision to not use a time corrected value of background  
179 respiration.

180 **RESULTS AND DISCUSSION**

181 **System design and testing:**

182 Water at 28°C ( $\pm 1^\circ\text{C}$ ) and 15ppt was used to fill the custom water bath and recirculated  
183 with an aquarium system to maintain temperature and reduce ammonium load. To validate that  
184 the flush period was long enough to fully replenish oxygen empty chambers were filled with  
185 water at a low oxygen concentration (~60% a.s.), achieved by bubbling in nitrogen, and flushed  
186 for over 8 minutes. Between 4 and 5 minutes after turning on the flush pump the oxygen level in  
187 the chamber exceeded 99% a.s. (Fig. S2). Using the equation for steady-state transformation  
188 shows that with a flush rate of 300mL/min, and a chamber that is 300mL in volume, water  
189 should reach 99% replacement after 4.61 minutes ( $t(99\%) = -\ln(1 - 0.99) \times 300 \text{ mL} / 300$   
190  $\text{mL}/\text{min} = 4.61 \text{ min}$ , (6)).

191 To test system leak one chamber in a pair was filled with water at oxygen concentration  
192 equal to ~50% a.s. and the other chamber in the pair was sealed with the flush pump running. A  
193 model of oxygen *versus*  $\log_{10}(\text{time})$  from 75% a.s. to 89% a.s. (maximum oxygen reached) was  
194 used to derive an equation that can be used to predict the amount of leak at a specific time point:  
195  $\text{slope (\% a.s. per minute)} = 7.4916/\text{time (minutes)}$ (Fig. S3). Note that this equation can be  
196 applied from the time when 75% a.s. was reached (16.5 minutes) and extrapolated to determine  
197 time to reach 100% a.s. (144.5 minutes) but not used to predict oxygen concentration at previous  
198 time points not included in the model. Leak did not exceed 0.5% a.s. per minute from 80 to 89%  
199 a.s. and decreased as the oxygen concentration in the chamber increased. At 85% a.s. or higher  
200 leak would not exceed 0.14% a.s per minute. Thus from 100% a.s. down to 85% a.s. leak would  
201 be negligibly low (below 6% of typical  $MO_2$ ). Below 85% a.s. leak would increase, however, the  
202 portion of the slope used to calculate  $MO_2$ , as described above (see metabolic rate calculation),  
203 would exclude the time period where oxygen levels would drop this low limiting the overall  
204 system leak. Leak could be reduced further by using material less permeable to oxygen to seal  
205 the chambers, although the cost of these materials may be higher (24).



206

## 207 Repeatability

208 A random set of 19 fish was measured in the HIFR, each in three different chambers over the  
209 course of one week (Monday, Wednesday, and Friday night). Log SMR was regressed against  
210 log body mass ( $y=2.66 + 1.08x$ ,  $R^2=0.59$ ,  $N=57$ , Fig. 4A), and a body mass correction was  
211 calculated as described above. The mean coefficient of variation (CV) within an individual was  
212 18.03% (Fig. 4B). SMR is repeatable (Fig. 4C), and the variance for each individual for three  
213 SMR measured in three different chambers is much smaller than the variance among individuals  
214 (ratio of variance in group means/mean of within individual variance = 74.54:1). To measure  
215 repeatability (R) directly:  $R = s_a^2 / (s_a^2 + s_w^2)$  where  $s_a^2$  equals the difference in the mean sum of  
216 squares among and within individuals divided by the number of measures per individual and  $s_w^2$   
217 equals the mean sum of squares within individuals (25, 26). The mean sum of squares among and  
218 within individuals can be taken from ANOVA (within = 0.0108, among = 0.8050) and using 3

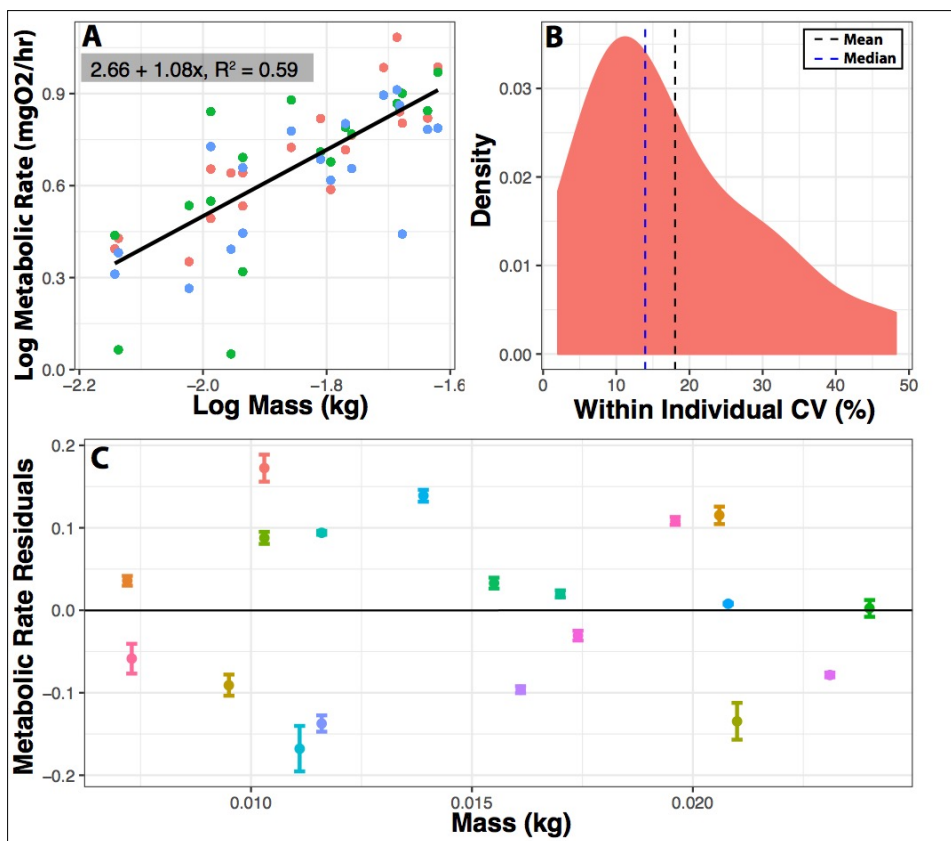

**Figure 4: Repeatability of Metabolic Measurements.** Metabolic rate was measured three times for 19 individuals in three different chambers within one week. **A)** Log metabolic rate ( $\text{mgO}_2/\text{hr}$ ) vs. log body mass regression. Values are corrected for background respiration. **B)** Distribution of coefficient of variation (CV) in minimum metabolic rate within an individual.  $\text{CV} = 100 \times (\text{standard deviation}/\text{mean})$ . **C)** Mean and standard error for SMR residuals among 19 individuals. Means are residuals from log-log body mass regression. Thus, positive values indicate that an individual had a higher than expected metabolic rate based on mass, and negative values indicate that an individual had lower than expected metabolic rate based on mass. Ratio of variance between to variance within = 74.82:1. Repeatability = 0.96.

219 measures per individual yields a repeatability of the tenth percentile value of metabolic rate, used  
220 here to represent SMR, of 0.96.

221 Metabolic rates measured in HIFR are comparable with values from previously reported  
222 metabolic rate values for *F. heteroclitus* ( $\pm 5\%$ ) and other teleost fish ( $\pm 40\%$ ) further validating  
223 the methods described here (16, 27, 28). To determine this, the metabolic rate reported for *F.*  
224 *heteroclitus* or other species acclimated to various temperatures was used to interpolate  
225 metabolic rate for an 8-gram individual at 28°C. Differences between values reported from our  
226 HIFR and other studies using *F. heteroclitus* may also be due to the type of metabolic rate (i.e.  
227 SMR, RMR, MMR) being measured and the environmental parameters (acclimation vs. acute  
228 temperature or hypoxia exposure, maximum vs. standard metabolic rate, etc.). The 18.03% CV  
229 within individuals for SMR is similar to previous studies that reported 12-14% CV in SMR,  
230 MMR, and aerobic scope of brown trout (29).

231 Depending on the oxygen sensing technology and software, a single respirometer (including the  
232 cost of oxygen sensing technology and software) may cost between \$2,000 and \$4,000, a  
233 significant investment especially considering that they are designed to measure one individual at  
234 a time, which may take hours or days. Some companies additionally offer high-throughput  
235 versions (up to 8 chambers) for small animals; however, the cost remains high ( $> \$2000$  per  
236 chamber). The HIFR presented here was assembled using basic materials and a moderately  
237 priced oxygen meter and oxygen sensors. Including the cost of the meter, sensors, and materials,  
238 HIFR costs \$855.50 per chamber to assemble, a 57% reduction in cost per respirometer  
239 compared to purchasing a Loligo high-throughput system. Additionally, the HIFR can  
240 simultaneously run up to 20 respirometers at once, greatly reducing the total time needed to  
241 achieve a large sample size, which holds value far beyond monetary savings. For example,  
242 within a one-week period at least 100 individuals could be run under the same experimental  
243 conditions introducing little variation due to time and requiring only 5 nights of respirometry set  
244 up with daily background respiration measures. The flexibility of the HIFR offers the additional  
245 advantage of allowing organisms of various sizes to be measured. By changing the size of the  
246 glass chambers and altering the flow rate of peristaltic pumps and flush pumps by changing the  
247 tubing size the system can easily be adapted to fit the desired organism. This further decreases  
248 costs for groups who may wish to measure a single species at various ages and stages of life or  
249 different species that may vastly differ in size (30).

250 Costs could be cut further by using less expensive peristaltic pumps or a different water bath than  
251 described here. However, the lifespan of a given pump varies greatly depending on the quality of  
252 the motor and the tubing. Several peristaltic pumps ranging from \$3 to \$50 were tested to  
253 determine the appropriate tubing material and motor design that could withstand frequent long-  
254 term use and alternation of motor polarity without rapidly burning out. Generally, it is  
255 recommended to use a peristaltic pump that has a brushed motor and tygon tubing and to  
256 determine the tubing size based on the desired flow rate. While there are large peristaltic pumps  
257 available it should be noted that depending on chamber size this may not provide enough mixing  
258 to prevent the stratification of water in the chamber (31). The addition of a closed loop mixing  
259 pump could mitigate this problem and provide adequate mixing, although this has not been tested  
260 here. Including the mixing pump would increase the total setup cost and without it the size of the  
261 chambers (and organisms) that can be measured with this system will be limited to those that can  
262 be adequately mixed with only a peristaltic pump.

263 The plexiglass tank served as a water bath for the chambers and could be replaced with a cheaper  
264 alternative as long as it could hold the appropriate volume of water needed to maintain a stable

265 temperature and prevent the buildup of nitrogenous waste over the course of the run. It would  
266 also need to be large enough to hold the desired number of chambers of a specific size. In  
267 general, the respirometer volume should be 20 to 50 times larger than the organism to achieve a  
268 measurable decrease in oxygen over a reasonable period of time (several minutes) (6, 12). If the  
269 respirometer volume does not fit within this ratio for a given organism the measurement period  
270 length can be adjusted to allow for the appropriate drop in oxygen (above 80% O<sub>2</sub> saturation) as  
271 long as routine movements are not inhibited by chamber size (6, 12). If variation in body mass of  
272 individuals is large, adjusting the measurement period to prevent low O<sub>2</sub> levels for larger  
273 individuals may mean that smaller individuals do not have a large enough O<sub>2</sub> decrease to get a  
274 reliable slope measurement. Using the HIFR design it is possible to use chambers of various  
275 sizes within a single run as long as pump flow rates were adjusted (tubing sizes) to accommodate  
276 this change. This allows for added flexibility of running different sized respirometry chambers  
277 simultaneously.

278 The throughput of this design is limited by the number of channels available on the oxygen  
279 meter. Any flow through oxygen sensing cells can be interchanged for the ones used here;  
280 however, the oxygen meter needs N channels (one per sensor) to allow measurement of 2N  
281 individuals at once. If an oxygen meter were available with 20 channels, for example, it is  
282 feasible that this design could be scaled to measure 40 individuals over the course of one night.  
283 An oxygen meter with fewer channels could be used to design a similar HIFR with fewer  
284 individual respirometers. Additionally, a HIFR could be built to measure ten individuals with ten  
285 channels by eliminating the double pole double throw relays and using an Arduino to turn the  
286 flush pump on and off.

287 Due to the size of the water bath and the available equipment, the most practical solution to  
288 maintaining a constant temperature in the water bath was to recirculate the water through a  
289 temperature-controlled aquaria system. This made it possible to pump the HIFR water bath into  
290 the same system the fish had been housed in prior to measuring metabolic rate so the temperature  
291 along with pH and salinity were not variable between the HIFR and the acclimation conditions  
292 (32).

293 It should be noted that the HIFR was built by an early career biology graduate student with little  
294 prior knowledge of electrical engineering or plumbing. The easy to learn techniques used make  
295 this methodology highly accessible.

296 The ability to precisely measure metabolic rates in a high-throughput manner without  
297 significantly increasing the necessary effort has application for physiologists, ecologist,  
298 geneticists, and comparative biologists alike. This method reduced the total system cost from  
299 ~\$2,000 per respirometer to ~\$900 per respirometer including the cost of the FTC, oxygen  
300 sensor, and oxygen meter. The HIFR also greatly reduced the effort needed to measure metabolic  
301 rate in a large sample size making it possible to answer questions relevant to ecological and  
302 evolutionary biology.

### 303 *ACKNOWLEDGEMENTS*

304 Thanks to Dr. Chris Langdon for his advice and assistance in construction and to Moritz Ehrlich  
305 for constructive discussion and HIFR testing. The authors additionally thank the reviewers and  
306 editor for their thoughtful comments that improved the manuscript. This research was supported  
307 by NSF/IOS 1556396 and NSF/IOS 1754437 to MFO and DLC.

308 **COMPETING INTERESTS**

309 The authors have no conflicts of interest.

310 **AUTHOR CONTRIBUTIONS**

311 HIFR design and testing and experimental design by MKD and AND. Data collection and  
312 analysis by MKD. Writing of the manuscript and production of figures by MKD, DLC, MFO.

313 **FUNDING**

314 Funding from National Science Foundation award IOS 1556396 and IOS 1754437.

315 **REFERENCES**

- 316 1. Christoffersen BO, Grand N, Golozoubova V, Svendsen O, Raun K. Gender-  
317 associated differences in metabolic syndrome-related parameters in Gottingen minipigs.  
318 *Comp Med*. 2007;57(5):493-504.
- 319 2. Pettersen AK, Marshall DJ, White CR. Understanding variation in metabolic rate.  
320 *J Exp Biol*. 2018;221(1).
- 321 3. Schulte PM. The effects of temperature on aerobic metabolism: towards a  
322 mechanistic understanding of the responses of ectotherms to a changing environment.  
323 *J Exp Biol*. 2015;218(Pt 12):1856-66.
- 324 4. Nespolo RF, Franco M. Whole-animal metabolic rate is a repeatable trait: a  
325 meta-analysis. *J Exp Biol*. 2007;210(Pt 11):2000-5.
- 326 5. Norin T, Malte H. Repeatability of standard metabolic rate, active metabolic rate  
327 and aerobic scope in young brown trout during a period of moderate food availability. *J*  
328 *Exp Biol*. 2011;214(Pt 10):1668-75.
- 329 6. Steffensen JF. Some Errors in Respirometry of Aquatic Breathers - How to Avoid  
330 and Correct for Them. *Fish Physiology and Biochemistry*. 1989;6(1):49-59.
- 331 7. Burton T, Killen SS, Armstrong JD, Metcalfe NB. What causes intraspecific  
332 variation in resting metabolic rate and what are its ecological consequences?  
333 *Proceedings of the Royal Society of London B: Biological Sciences*. 2011.
- 334 8. Everett MV, Crawford DL. Adaptation versus allometry: population and body  
335 mass effects on hypoxic metabolism in *Fundulus grandis*. *Physiol Biochem Zool*.  
336 2010;83(1):182-90.
- 337 9. Gaitan-Espitia JD, Bruning A, Mondaca F, Nespolo RF. Intraspecific variation in  
338 the metabolic scaling exponent in ectotherms: testing the effect of latitudinal cline,  
339 ontogeny and transgenerational change in the land snail *Cornu aspersum*. *Comp*  
340 *Biochem Physiol A Mol Integr Physiol*. 2013;165(2):169-77.
- 341 10. Gaitan-Espitia JD, Nespolo R. Is there metabolic cold adaptation in terrestrial  
342 ectotherms? Exploring latitudinal compensation in the invasive snail *Cornu aspersum*. *J*  
343 *Exp Biol*. 2014;217(Pt 13):2261-7.

- 344 11. Nespolo RF, Lardies MA, Bozinovic F. Intrapopulational variation in the standard  
345 metabolic rate of insects: repeatability, thermal dependence and sensitivity (Q10) of  
346 oxygen consumption in a cricket. *J Exp Biol.* 2003;206(Pt 23):4309-15.
- 347 12. Svendsen MB, Bushnell PG, Steffensen JF. Design and setup of intermittent-flow  
348 respirometry system for aquatic organisms. *J Fish Biol.* 2016;88(1):26-50.
- 349 13. Rosewarne PJ, Wilson JM, Svendsen JC. Measuring maximum and standard  
350 metabolic rates using intermittent-flow respirometry: a student laboratory investigation of  
351 aerobic metabolic scope and environmental hypoxia in aquatic breathers. *J Fish Biol.*  
352 2016;88(1):265-83.
- 353 14. Snyder S, Nadler LE, Bayley JS, Svendsen MB, Johansen JL, Domenici P, et al.  
354 Effect of closed v. intermittent-flow respirometry on hypoxia tolerance in the shiner  
355 perch *Cymatogaster aggregata*. *J Fish Biol.* 2016;88(1):252-64.
- 356 15. Tomlinson S, Dalziell EL, Withers PC, Lewandrowski W, Dixon KW, Merritt DJ.  
357 Measuring metabolic rates of small terrestrial organisms by fluorescence-based closed-  
358 system respirometry. *J Exp Biol.* 2018;221(Pt 7).
- 359 16. Chabot D, Steffensen JF, Farrell AP. The determination of standard metabolic  
360 rate in fishes. *Journal of Fish Biology.* 2016;88(1):81-121.
- 361 17. Norin T, Malte H, Clark TD. Differential plasticity of metabolic rate phenotypes in  
362 a tropical fish facing environmental change. *Funct Ecol.* 2016;30(3):369-78.
- 363 18. Killen SS, Reid D, Marras S, Domenici P. The interplay between aerobic  
364 metabolism and antipredator performance: vigilance is related to recovery rate after  
365 exercise. *Front Physiol.* 2015;6.
- 366 19. Able KW, Fewlley JD. Geographical variation in *Fundulus heteroclitus*: tests for  
367 the concordance between egg and adult morphologies. *Amer Zool.* 1986;25:145-57.
- 368 20. Burnett KG, Bain LJ, Baldwin WS, Callard GV, Cohen S, Di Giulio RT, et al.  
369 *Fundulus* as the premier teleost model in environmental biology: opportunities for new  
370 insights using genomics. *Comp Biochem Physiol Part D Genomics Proteomics.*  
371 2007;2(4):257-86.
- 372 21. Roche DG, Binning SA, Bosiger Y, Johansen JL, Rummer JL. Finding the best  
373 estimates of metabolic rates in a coral reef fish. *J Exp Biol.* 2013;216(11):2103-10.
- 374 22. Steffensen JF, Bushnell PG, Schurmann H. Oxygen consumption in four species  
375 of teleosts from Greenland: no evidence of metabolic cold adaptation. *Polar Biology.*  
376 1994;14(1):49-54.
- 377 23. Beamish FWH. Respiration of fishes with special emphasis on standard oxygen  
378 consumption. II. Influence of weight and temperature on respiration of several species.  
379 *Can J Zoolog.* 1964;42:177-88.
- 380 24. Stevens ED. Use of Plastic Materials in Oxygen-Measuring Systems. *J Appl*  
381 *Physiol.* 1992;72(2):801-4.
- 382 25. Nakagawa S, Schielzeth H. Repeatability for Gaussian and non-Gaussian data: a  
383 practical guide for biologists. *Biol Rev Camb Philos Soc.* 2010;85(4):935-56.



- 384 26. Lessells CM, Boag PT. Unrepeatable Repeatabilities - a Common Mistake. *Auk*.  
385 1987;104(1):116-21.
- 386 27. Healy TM, Schulte PM. Thermal acclimation is not necessary to maintain a wide  
387 thermal breadth of aerobic scope in the common killifish (*Fundulus heteroclitus*). *Physiol*  
388 *Biochem Zool*. 2012;85(2):107-19.
- 389 28. Blewett TA, Robertson LM, Maclatchy DL, Wood CM. Impact of environmental  
390 oxygen, exercise, salinity, and metabolic rate on the uptake and tissue-specific  
391 distribution of 17 $\alpha$ -ethynylestradiol in the euryhaline teleost *Fundulus heteroclitus*.  
392 *Aquat Toxicol*. 2013;138-139:43-51.
- 393 29. Norin T, Malte H. Intraspecific variation in aerobic metabolic rate of fish: relations  
394 with organ size and enzyme activity in brown trout. *Physiol Biochem Zool*.  
395 2012;85(6):645-56.
- 396 30. Killen SS, Gamperl AK, Brown JA. Ontogeny of predator-sensitive foraging and  
397 routine metabolism in larval shorthorn sculpin, *Myoxocephalus scorpius*. *Marine Biology*  
398 (Berlin). 2007;152(6):1249-61.
- 399 31. Rodgers GG, Tenzing P, Clark TD. Experimental methods in aquatic  
400 respirometry: the importance of mixing devices and accounting for background  
401 respiration. *Journal of Fish Biology*. 2016;88(1):65-80.
- 402 32. Fry FEJ. The effect of environmental factors on the physiology of fish. *Fish*  
403 *physiology*, Academic Press, New York & London, i-xvi, 1-559: Academic Press, New  
404 York & London; 1971. p. 1-98.

405

#### 406 **FIGURE LEGENDS**

407 **Figure 1: Intermittent Flow Respirometry.** Oxygen concentration over time in a chamber  
408 during intermittent flow respirometry. There are two period types: Measurement and Flush.  
409 Measurement periods (gray shading) occur when the chamber is sealed, and the decrease in  
410 oxygen concentration reflects oxygen consumption by the organism. The slopes of the lines  
411 (oxygen vs. time) during the measurement periods are used to calculate metabolic rate. Flush  
412 periods are when the rapid increase in oxygen occurs as fully oxygenated water is pump into the  
413 chamber. Data displayed are from the setup described here.

414

415 **Figure 2: Pumping Circuits.** **A)** Pairs of chambers in the high-throughput intermittent flow  
416 respirometer. Circuit 1 (red), circuit 2 (blue). One-way valves (black arrows) control flow  
417 direction. By changing the polarity of the peristaltic pump motor, the peristaltic pump direction  
418 changes. **B)** Overall schematic of HIFR. The basic design is a PVC rack that holds and secures  
419 glass chambers with their rubber stoppers, which is placed in a large water bath. Each chamber is  
420 connected to flush pumps and re-circulating pumps with oxygen sensors. Throughput is limited  
421 by the number of channels on the oxygen meter (N) with this design able to measure 2N  
422 individuals simultaneously.

423

424 **Figure 3: Metabolic Rate Measurement Over Time.** Metabolic rate *versus* time since fish  
425 were added to the chambers (mean and standard error across all individuals on an hourly basis).



426 Fish reached a resting state in the chamber between 3 and 4 hours when left undisturbed.  
 427 Replicates used in calculating metabolic rate ( $MO_2$ ) are indicated (shaded box). Letters indicate  
 428 significant differences among time points (ANOVA,  $\alpha=0.05$ ). **Inset:** The lower 10<sup>th</sup> percentile  
 429 values from the cumulative frequency distribution of this subset of replicates were used to  
 430 estimate standard metabolic rate for each individual.

431  
 432 **Figure 4: Repeatability of Metabolic Measurements.** Metabolic rate was measured three times  
 433 for 19 individuals in three different chambers within one week. **A)** Log metabolic rate ( $mgO_2/hr$ )  
 434 vs. log body mass regression. Values are corrected for background respiration. **B)** Distribution of  
 435 coefficient of variation (CV) in minimum metabolic rate within an individual.  $CV =$   
 436  $100 * (\text{standard deviation} / \text{mean})$ . **C)** Mean and standard error for SMR residuals among 19  
 437 individuals. Means are residuals from log-log body mass regression. Thus, positive values  
 438 indicate that an individual had a higher than expected metabolic rate based on mass, and negative  
 439 values indicate that an individual had lower than expected metabolic rate based on mass. Ratio of  
 440 variance between to variance within = 74.82:1. Repeatability = 0.96.

#### 441 *SUPPLEMENTARY MATERIAL*

442 **Table 1: Materials used in building the HIFR with prices rounded to the nearest \$0.25.**

| Material                                             | Manufacturer                  | Cost per unit                | Units needed | Total Cost | Cost per chamber |
|------------------------------------------------------|-------------------------------|------------------------------|--------------|------------|------------------|
| Plexiglass                                           | Hardware store                | \$200.00 per 6ft x 4ft sheet | 1            | \$200      | \$10.00          |
| Water safe silicone glue                             | Hardware store                | \$5.00 per tube              | 1            | \$5.00     | \$0.25           |
| Plastic Weld                                         | Hardware store                | \$6.00 per 50mL              | 1            | \$6.00     | \$0.30           |
| 2mm inner diameter x 4mm outer diameter tygon tubing | Amazon                        | \$23.00 for 15 meters        | 1            | \$23.00    | \$1.15           |
| Glass chambers                                       | Greatglas Inc.                | \$10.00 per chamber          | 20           | \$200.00   | \$10.00          |
| Rubber stoppers with two 4mm holes                   | WidgetCo                      | \$2.00 per stopper           | 40           | \$80.00    | \$4.00           |
| 4mm outer diameter x 50mm length capillary tubes     | Amazon                        | \$1.25 per tube              | 80           | \$100.00   | \$5.00           |
| One-way valves with luer locks                       | Amazon                        | \$1.00 per valve             | 60           | \$60.00    | \$3.00           |
| 0.32 cm barb male luer locks                         | Amazon                        | \$11.00 for 25               | 40           | \$22.00    | \$1.10           |
| 0.32 cm barb female luer locks                       | Amazon                        | \$11.00 for 25               | 50           | \$22.00    | \$1.10           |
| Peristaltic pumps, 12V motor, tygon tubing           | Williamson Manufacturing (UK) | \$50.00                      | 10           | \$500.00   | \$25.00          |
| Submersible pumps for flushing                       | Amazon                        | \$20.00                      | 2            | \$40.00    | \$2.00           |
| Electronics                                          |                               |                              |              |            |                  |

|                                                             |         |                 |    |                    |                 |
|-------------------------------------------------------------|---------|-----------------|----|--------------------|-----------------|
| Arduino Uno                                                 | Amazon  | \$20.00         | 1  | \$20.00            | \$1.00          |
| Double Pole Double Throw Relays                             | Amazon  | \$10.00 for 10  | 10 | \$10.00            | \$1.00          |
| AC/DC Converter Power Supply Box                            | DigiKey | \$30.00 per box | 2  | \$60.00            | \$2.00          |
| Black and red electrical wires                              | DigiKey | \$30.00 for 50m | 2  | \$60.00            | \$2.00          |
| Outlet box                                                  | Amazon  | \$5.00 for 10   | 2  | \$5.00             | \$0.25          |
| 5V relay                                                    | Amazon  | \$5.00 for 2    | 1  | \$5.00             | \$0.25          |
| Replacement power cable                                     | Amazon  | \$5.00          | 1  | \$5.00             | \$0.025         |
| <b>Cost without Oxygen Sensing Equipment</b>                |         |                 |    | <b>\$1,423.00</b>  | <b>\$71.25</b>  |
| <b>Oxygen Sensing Technology Costs</b>                      |         |                 |    |                    |                 |
| PreSens OXY10 oxygen meter                                  | PreSens | \$13,966.00     | 1  | \$13,966           | \$698.50        |
| PreSens flow through cells for oxygen (FTC-PS7-10-YOP)      | PreSens | \$85.00         | 10 | \$850.00           | \$42.50         |
| PreSens fiber optic cable oxygen sensors (POF-FTC-L2.5-1ST) | PreSens | \$70.00         | 10 | \$700.00           | \$35.00         |
| PreSens PT100 temperature probe                             | PreSens | \$163.00        | 1  | \$163.00           | \$8.25          |
| <b>Cost of Oxygen Sensing Equipment</b>                     |         |                 |    | <b>\$15,679.00</b> | <b>\$784.25</b> |
| <b>Total Cost</b>                                           |         |                 |    | <b>\$17,102.00</b> | <b>\$855.50</b> |

443

444

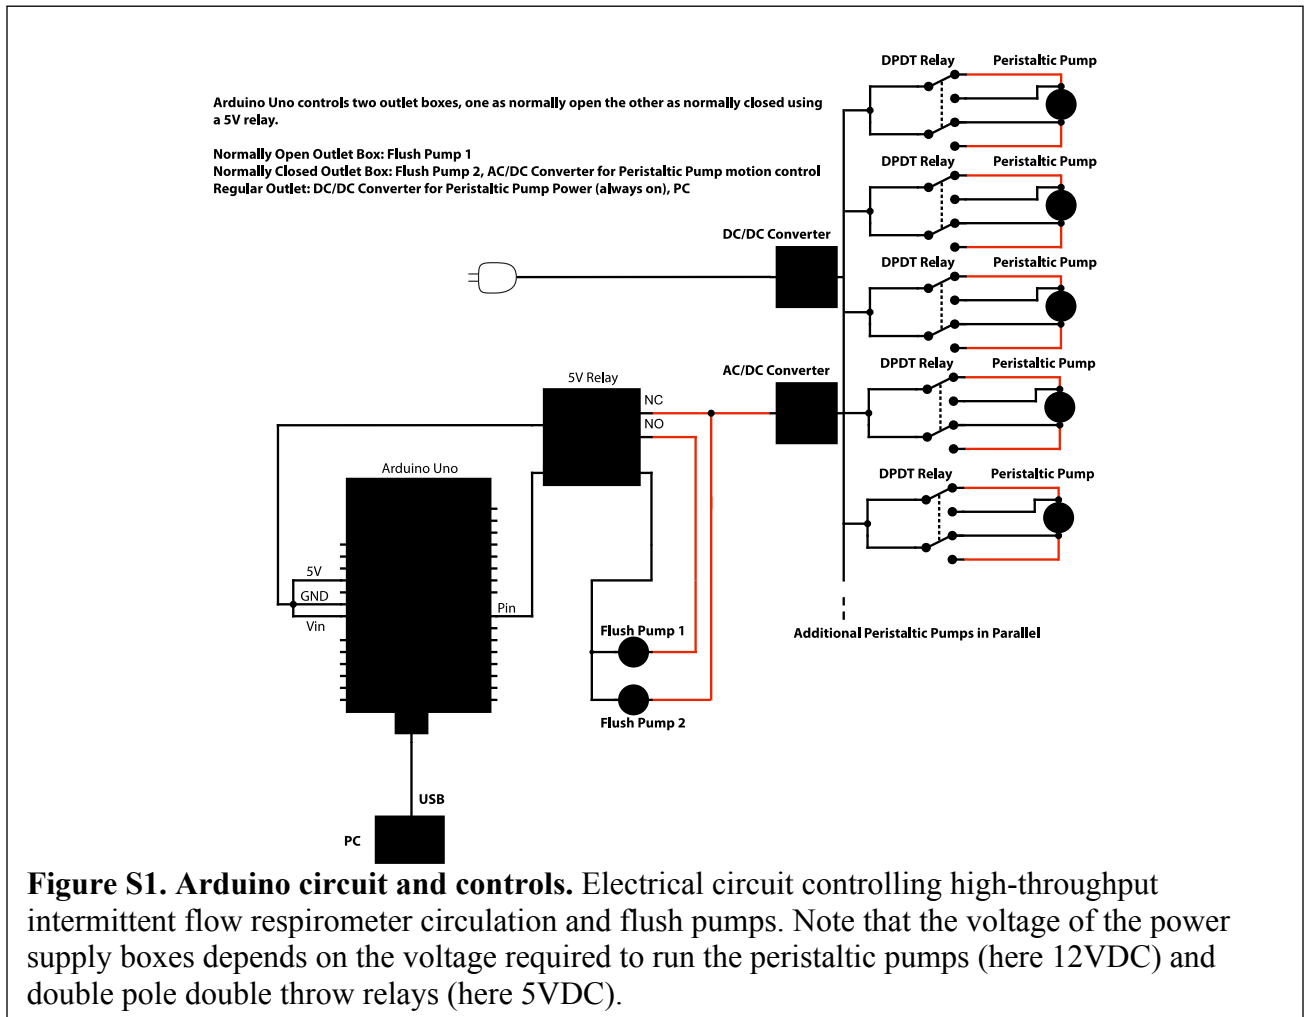

446

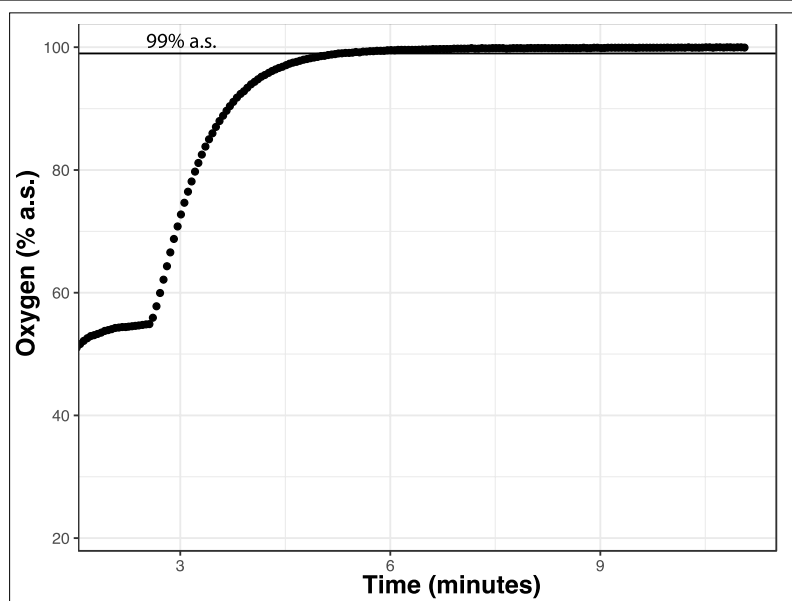

**Figure S2: Oxygen Over Time During Flush Period.** A chamber was filled with water at a low oxygen concentration (achieved by bubbling in nitrogen) and sealed before turning on the flush pump. Between 4 and 5 minutes after turning on the flush pump oxygen reached greater than 99% air saturation as expected based on steady state transformation equation ( $t(99\%) = -\ln(1 - 0.99) \times 300 \text{ mL} / 300 \text{ mL/min} = 4.61 \text{ min}$ , (6)).

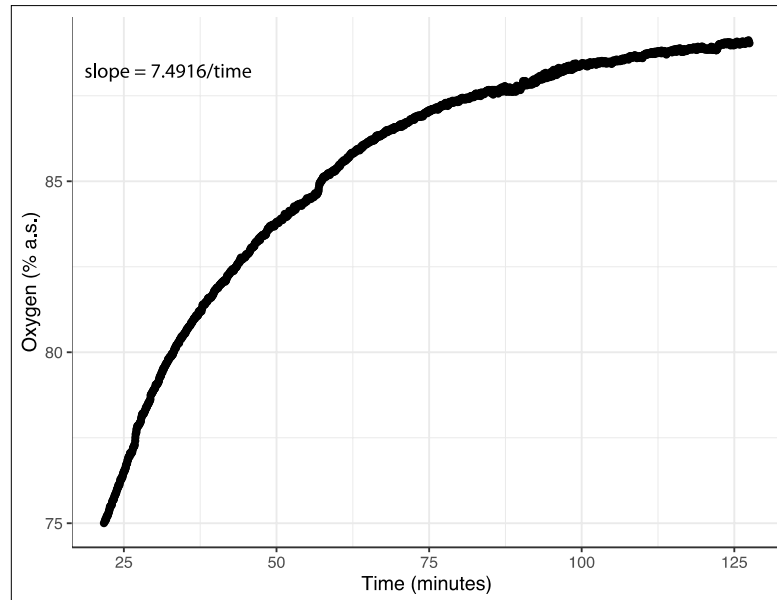

**Figure S3: Leak of Oxygen over Time in a Sealed Chamber.** A chamber was filled with water at a low oxygen concentration (achieved by bubbling in nitrogen) and sealed while the paired chamber was flushed. A model of oxygen *versus*  $\log_{10}(\text{time})$  was used to derive an equation that can be used to predict the amount of leak at a specific time point during the test: slope (% a.s. per minute) =  $7.4916/\text{time}$  (minutes). Leak did not exceed 0.14% a.s. per minute from 85 to 89% a.s. and decreased as the oxygen concentration in the chamber increased.

bioRxiv preprint doi: <https://doi.org/10.1101/2020.01.20.912469>; this version posted January 20, 2020. The copyright holder for this preprint (which was not certified by peer review) is the author/funder, who has granted bioRxiv a license to display the preprint in perpetuity. It is made available under aCC-BY 4.0 International license.

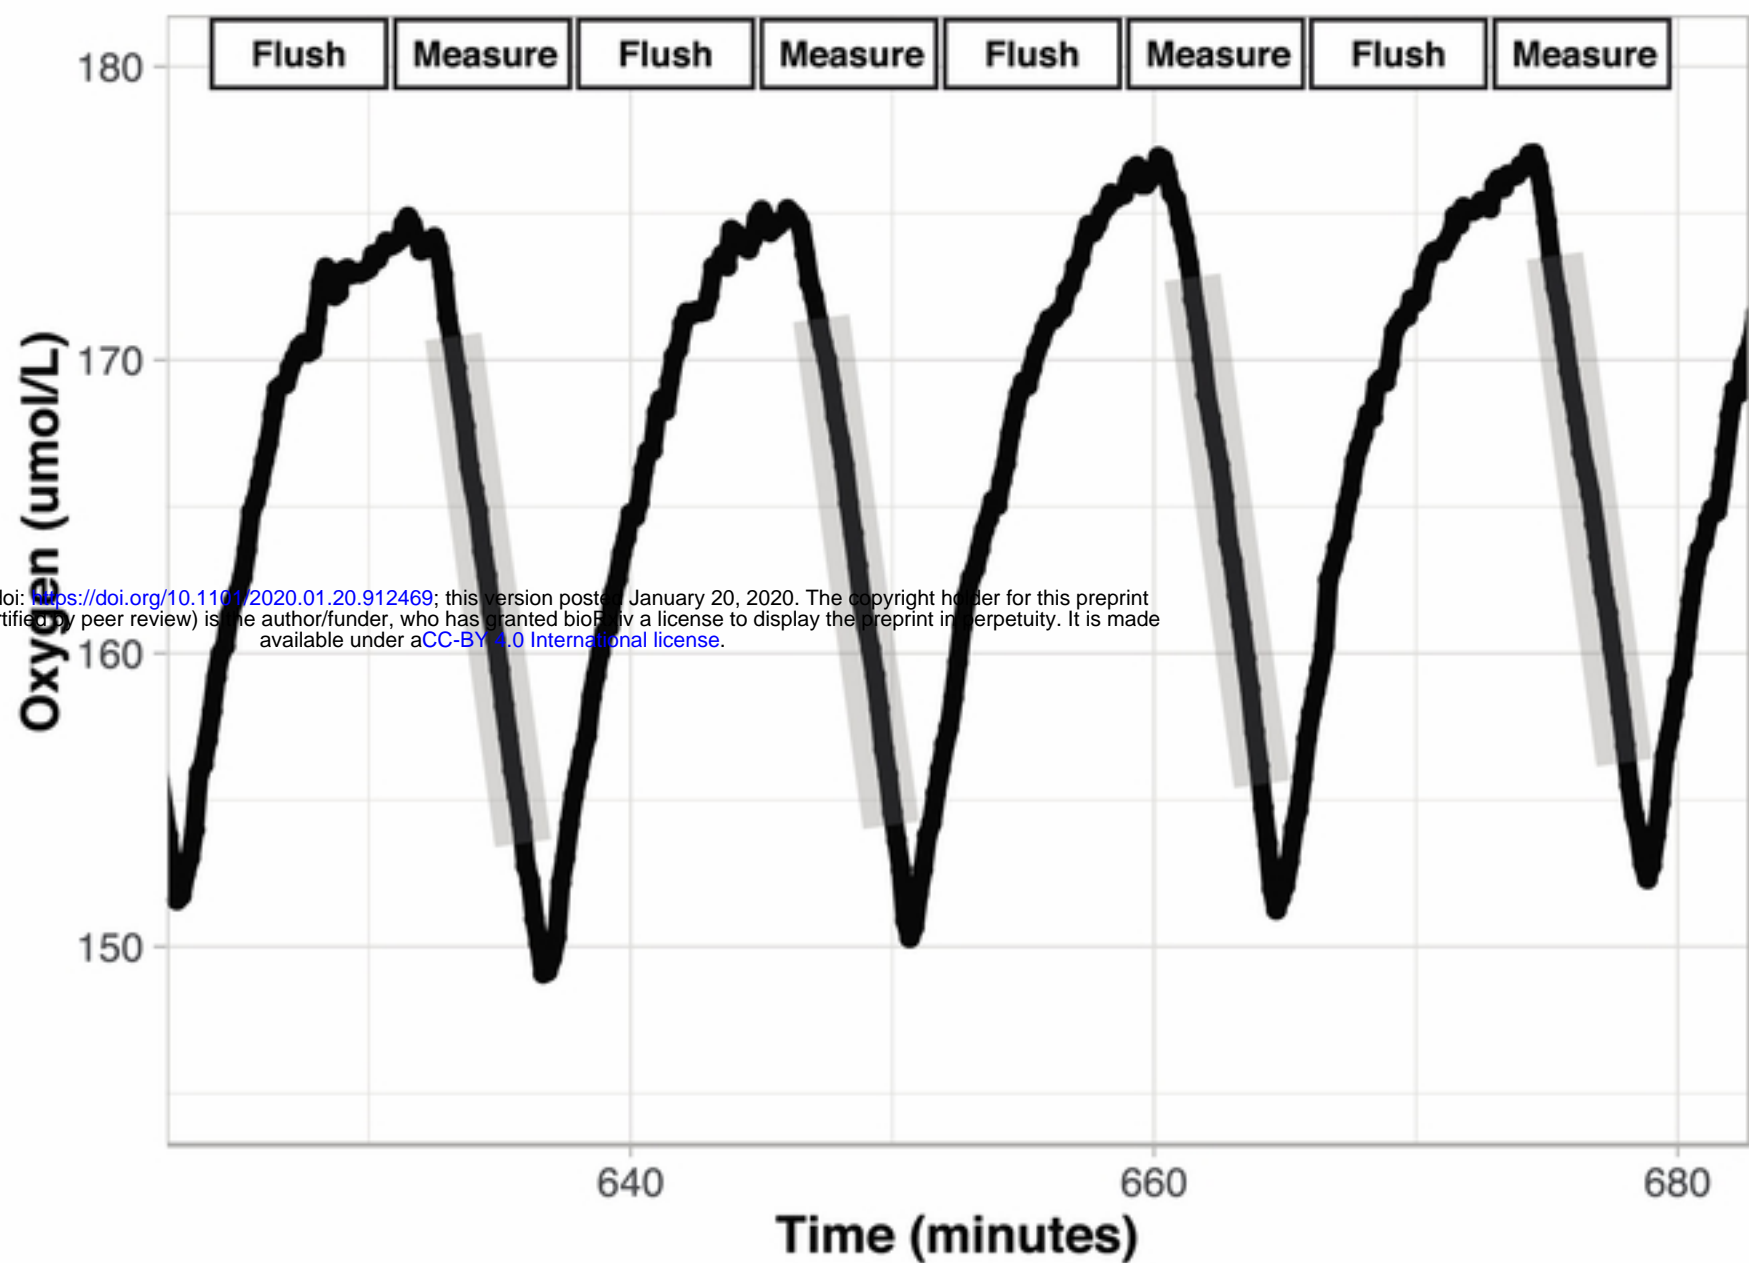

**Figure 1: Intermittent Flow Respirometry.** Oxygen concentration over time in a chamber during intermittent flow respirometry. There are two period types: Measurement and Flush. Measurement periods (gray shading) occur when the chamber is sealed, and the decrease in oxygen concentration reflects oxygen consumption by the organism. The slopes of the lines (oxygen vs. time) during the measurement periods are used to calculate metabolic rate. Flush periods are when the rapid increase in oxygen occurs as fully oxygenated water is pump into the chamber. Data displayed are from the setup described here.



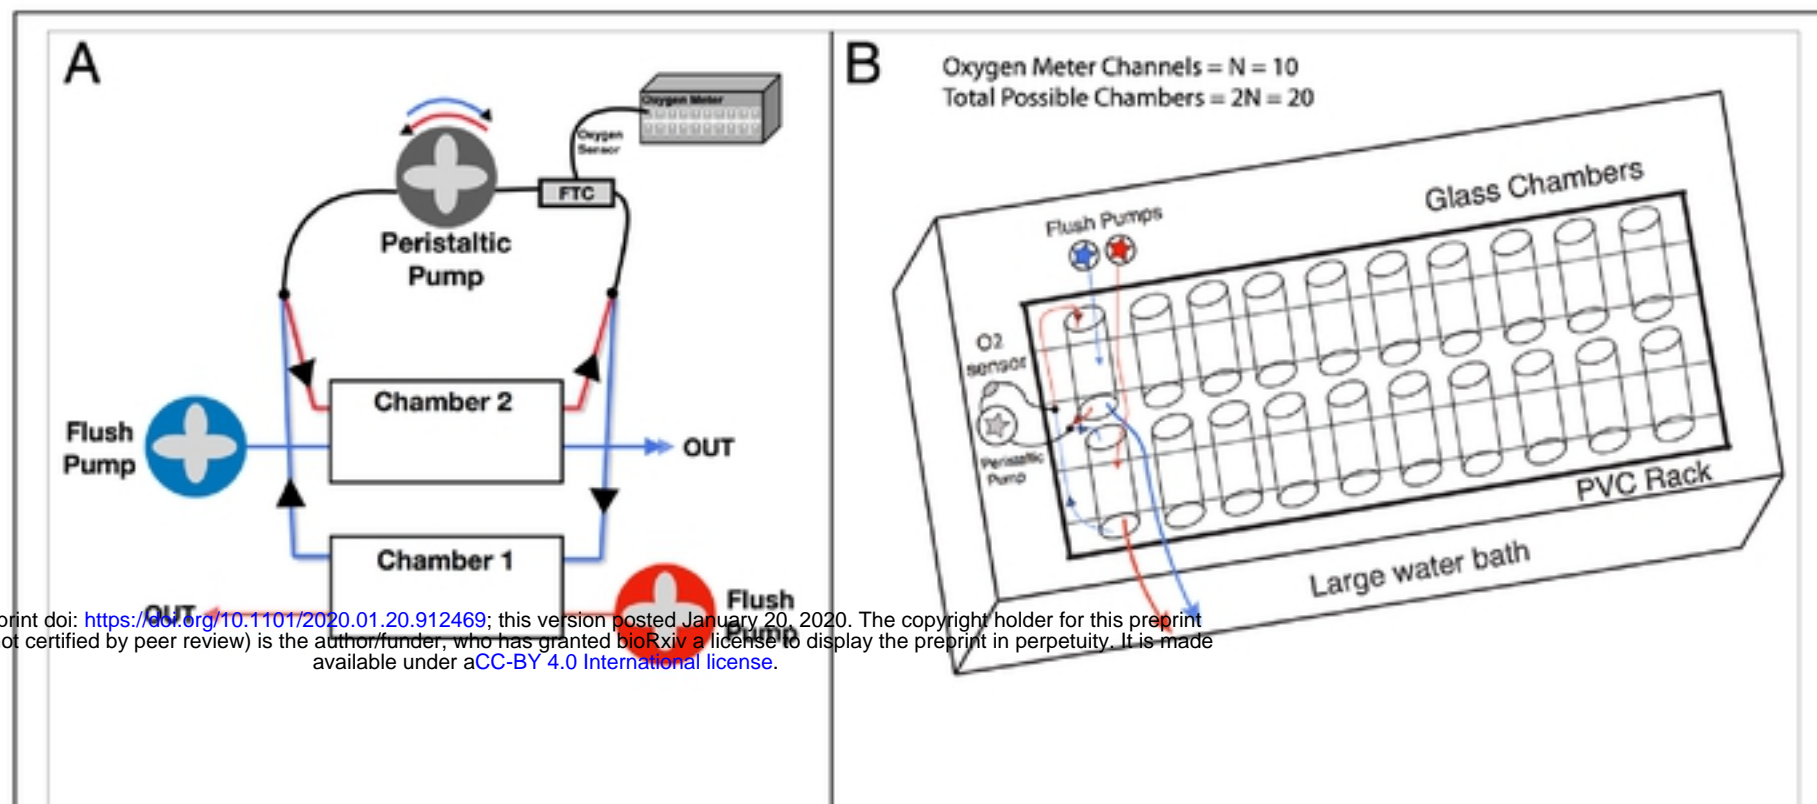

bioRxiv preprint doi: <https://doi.org/10.1101/2020.01.20.912469>; this version posted January 20, 2020. The copyright holder for this preprint (which was not certified by peer review) is the author/funder, who has granted bioRxiv a license to display the preprint in perpetuity. It is made available under aCC-BY 4.0 International license.

**Figure 2: Pumping Circuits.** **A)** Pairs of chambers in the high-throughput intermittent flow respirometer. Circuit 1 (red), circuit 2 (blue). One-way valves (black arrows) control flow direction. By changing the polarity of the peristaltic pump motor, the peristaltic pump direction changes. **B)** Overall schematic of HIFR. The basic design is a PVC rack that holds and secures glass chambers with their rubber stoppers, which is placed in a large water bath. Each chamber is connected to flush pumps and re-circulating pumps with oxygen sensors. Throughput is limited by the number of channels on the oxygen meter ( $N$ ) with this design able to measure  $2N$  individuals simultaneously.

bioRxiv preprint doi: <https://doi.org/10.1101/2020.01.20.912469>; this version posted January 20, 2020. The copyright holder for this preprint (which was not certified by peer review) is the author/funder, who has granted bioRxiv a license to display the preprint in perpetuity. It is made available under aCC-BY 4.0 International license.

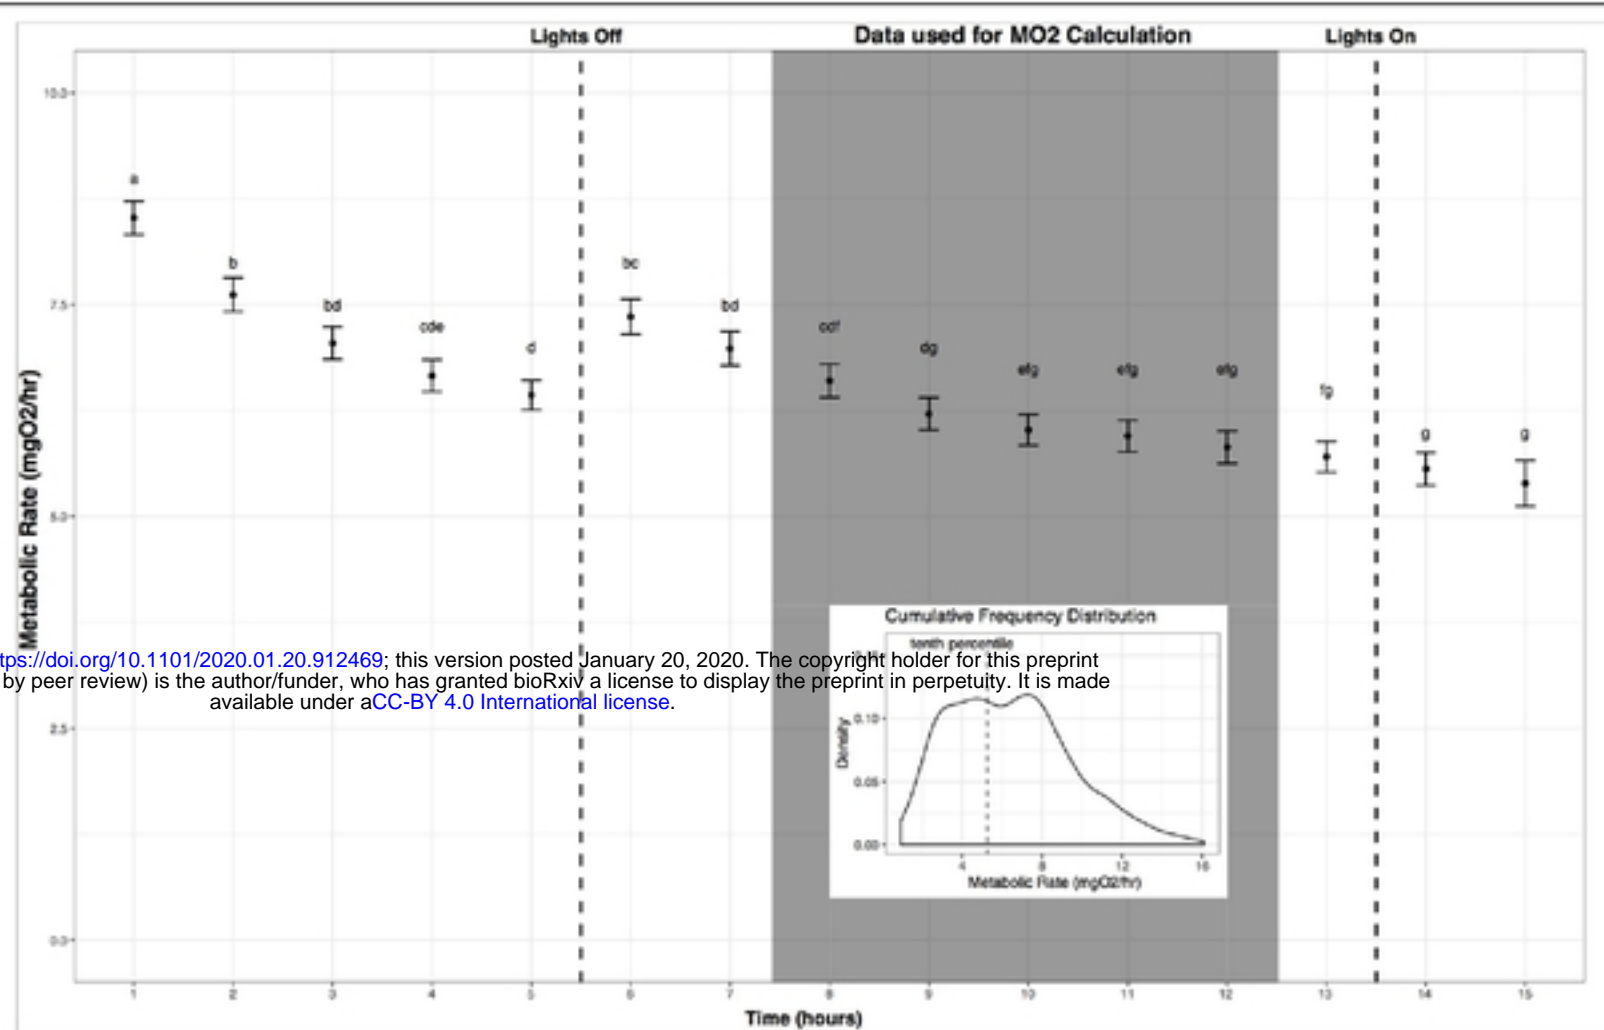

**Figure 3: Metabolic Rate Measurement Over Time.** Metabolic rate *versus* time since fish were added to the chambers (mean and standard error across all individuals on an hourly basis). Fish reached a resting state in the chamber between 3 and 4 hours when left undisturbed. Replicates used in calculating metabolic rate (MO<sub>2</sub>) are indicated (shaded box). Letters indicate significant differences among time points (ANOVA,  $\alpha=0.05$ ). **Inset:** The lower 10<sup>th</sup> percentile values from the cumulative frequency distribution of this subset of replicates were used to estimate standard metabolic rate for each individual.

bioRxiv preprint doi: <https://doi.org/10.1101/2020.01.20.912469>; this version posted January 20, 2020. The copyright holder for this preprint (which was not certified by peer review) is the author/funder, who has granted bioRxiv a license to display the preprint in perpetuity. It is made available under aCC-BY 4.0 International license.

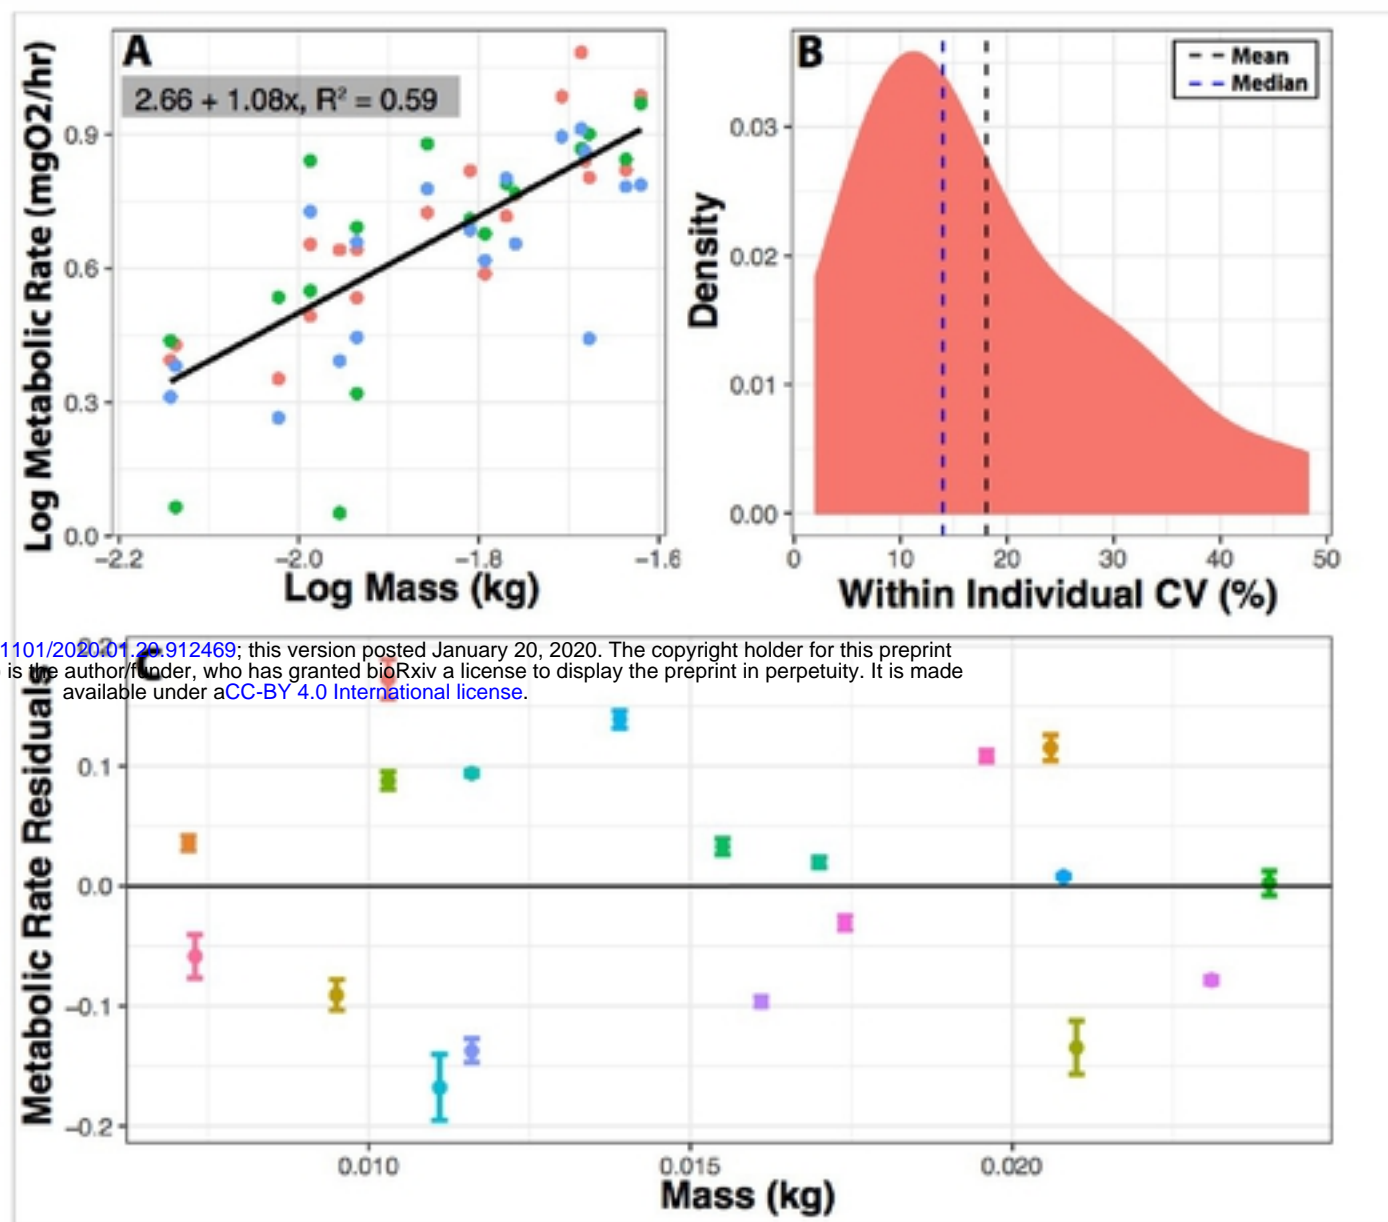

**Figure 4: Repeatability of Metabolic Measurements.** Metabolic rate was measured three times for 19 individuals in three different chambers within one week. **A)** Log metabolic rate (mgO<sub>2</sub>/hr) vs. log body mass regression. Values are corrected for background respiration. **B)** Distribution of coefficient of variation (CV) in minimum metabolic rate within an individual.  $CV = 100 \times (\text{standard deviation}/\text{mean})$ . **C)** Mean and standard error for SMR residuals among 19 individuals. Means are residuals from log-log body mass regression. Thus, positive values indicate that an individual had a higher than expected metabolic rate based on mass, and negative values indicate that an individual had lower than expected metabolic rate based on mass. Ratio of variance between to variance within = 74.82:1. Repeatability = 0.96.
